# Supplementary material for: Insights into antiradical mechanism and pro-oxidant enzyme inhibitor activity of walterolactone A/B 6-O-gallate-β-d-pyranoglucoside originating fromEuonymus laxiflorusChamp. usingin silicostudy
Source: Royal Society of Chemistry journal article supplement (doi:10.1039/d2ra05312h), 2022-01-01
Supplement: d2ra05312h1.pdf [file d2ra05312h1.pdf]

## Supplementary Information (SI)

---

### **Insights into antiradical mechanism and pro-oxidant enzyme inhibitor activity of walterolactone A/B 6-O-gallate- $\beta$ -D-pyranoglucoside originated from *Euonymus laxiflorus* Champ. using *in silico* study**

Phan Tu Quy<sup>1</sup>, Nguyen Anh Dzung<sup>2</sup>, Mai Van Bay<sup>3</sup>, Nguyen Van Bon<sup>2</sup>, Doan Manh Dung<sup>2</sup>, Pham  
Cam Nam<sup>4</sup>, and Nguyen Minh Thong<sup>5\*</sup>

<sup>1</sup> Department of Natural Sciences & Technology, Tay Nguyen University, Buon Ma Thuot  
630000, Vietnam

<sup>2</sup> Institute of Biotechnology and Environment, Tay Nguyen University, Buon Ma Thuot 630000,  
Vietnam

<sup>3</sup> The University of Danang - University of Science and Education, Danang 550000, Vietnam

<sup>4</sup> The University of Danang - University of Science and Technology, Danang 550000, Vietnam

<sup>5</sup> The University of Danang, Campus in Kon Tum, 704 Phan Dinh Phung, Kon Tum, Vietnam

\*Corresponding author: [nmthong@kontum.udn.vn](mailto:nmthong@kontum.udn.vn). (Nguyen Minh Thong)

## Table of Contents

|                                                                                                                                                                                                              |    |
|--------------------------------------------------------------------------------------------------------------------------------------------------------------------------------------------------------------|----|
| Table S1. The method to calculate rate constant following the conventional transition state theory .....                                                                                                     | 3  |
| Table S2. The cartesian coordinates and energies of transition states in the studied media.....                                                                                                              | 3  |
| Table S3. Molecular docking parameters for each protein target .....                                                                                                                                         | 13 |
| Figure S1. IRC plots for all transition states related to reaction of HOO• radical with the studied species (W: water, P: pentylethanoate) .....                                                             | 14 |
| Figure S2. Parameters obtained in the validation of docking protocols for CP450, LO, MP, NO and XO receptors. The experimental structures (shown in gray) and the docked structures (shown in yellow). ..... | 14 |

**Table S1.** The method to calculate rate constant following the conventional transition state theory

|                                                                                                                                                                                                                                                                                                                                                                                                                                                                                                                                                                                                                                                                                                                                                                                                                                                                                                                                                                                                                                                                                                                                                                                                                                                                                                                                                                                                                                                                                                                                                                                                                                                                                                                                                                                                                                                                                                                                                                                                                                                                                                                                                                                                                                                                                                                                                                                                                                                                                                                                                                                                                                                                                                                                                                                                                                                                                                                                                                                                                                                                                                                                                                                                                                                                                                                                                                                                                                                                                                                                                                                               |
|-----------------------------------------------------------------------------------------------------------------------------------------------------------------------------------------------------------------------------------------------------------------------------------------------------------------------------------------------------------------------------------------------------------------------------------------------------------------------------------------------------------------------------------------------------------------------------------------------------------------------------------------------------------------------------------------------------------------------------------------------------------------------------------------------------------------------------------------------------------------------------------------------------------------------------------------------------------------------------------------------------------------------------------------------------------------------------------------------------------------------------------------------------------------------------------------------------------------------------------------------------------------------------------------------------------------------------------------------------------------------------------------------------------------------------------------------------------------------------------------------------------------------------------------------------------------------------------------------------------------------------------------------------------------------------------------------------------------------------------------------------------------------------------------------------------------------------------------------------------------------------------------------------------------------------------------------------------------------------------------------------------------------------------------------------------------------------------------------------------------------------------------------------------------------------------------------------------------------------------------------------------------------------------------------------------------------------------------------------------------------------------------------------------------------------------------------------------------------------------------------------------------------------------------------------------------------------------------------------------------------------------------------------------------------------------------------------------------------------------------------------------------------------------------------------------------------------------------------------------------------------------------------------------------------------------------------------------------------------------------------------------------------------------------------------------------------------------------------------------------------------------------------------------------------------------------------------------------------------------------------------------------------------------------------------------------------------------------------------------------------------------------------------------------------------------------------------------------------------------------------------------------------------------------------------------------------------------------------|
| <p>The rate constant (<math>k</math>) was calculated by using the conventional transition state theory (TST) (at 298.15 K, 1M standard state) according to the equation (1):<sup>1-5</sup></p> $k = \sigma \kappa \frac{k_B T}{h} e^{-(\Delta G^\ddagger)/RT} \quad (1)$ <p>Where: <math>\sigma</math> is the reaction symmetry number,<sup>6,7</sup><br/> <math>\kappa</math> contains the tunneling corrections calculated using the Eckart barrier,<sup>8</sup><br/> <math>k_B</math> is the Boltzmann constant,<br/> <math>h</math> is the Planck constant,<br/> <math>\Delta G^\ddagger</math> is the Gibbs free energy of activation.</p> <p>The Marcus Theory was used to estimate the reaction barriers of SET reactions.<sup>9-12</sup> The free energy of reaction <math>\Delta G^\ddagger</math> for the SET pathway was computed following the equations (2,3).</p> $\Delta G_{SET}^\ddagger = \frac{\lambda}{4} \left( 1 + \frac{\Delta G_{SET}^0}{\lambda} \right)^2 \quad (2)$ $\lambda \approx \Delta E_{SET} - \Delta G_{SET}^0 \quad (3)$ <p>where <math>\Delta G_{SET}</math> is the Gibbs energy of reaction, <math>\Delta E_{SET}</math> is the non-adiabatic energy difference between reactants and vertical products for SET.<sup>13,14</sup></p> <p>For rate constants that were close to the diffusion limit a correction was applied to yield realistic results<sup>15</sup>. The apparent rate constants (<math>k_{app}</math>) were calculated following the Collins–Kimball theory in the solvents at 298.15K;<sup>16</sup> the steady-state Smoluchowski rate constant (<math>k_D</math>) for an irreversible bimolecular diffusion–controlled reaction was calculated following the literature as corrodng to equations (4,5).<sup>15,17</sup></p> $k_{app} = \frac{k_{TST} k_D}{k_{TST} + k_D} \quad (4)$ $k_D = 4\pi R_{AB} D_{AB} N_A \quad (5)$ <p>where <math>R_{AB}</math> is the reaction distance, <math>N_A</math> is the Avogadro constant, and <math>D_{AB} = D_A + D_B</math> (<math>D_{AB}</math> is the mutual diffusion coefficient of the reactants A and B),<sup>16,18</sup> where <math>D_A</math> or <math>D_B</math> is estimated using the Stokes–Einstein formulation (6).<sup>19,20</sup></p> $D_{A \text{ or } B} = \frac{k_B T}{6\pi \eta a_{A \text{ or } B}} \quad (6)$ <p><math>\eta</math> is the viscosity of the solvents (i.e. <math>\eta(\text{H}_2\text{O}) = 8.91 \times 10^{-4}</math> Pa s, <math>\eta(\text{pentyl ethanoate}) = 8.62 \times 10^{-4}</math> Pa s) and <math>a</math> is the radius of the solute.</p> <p>The kinetic study requires different considerations. Water (dielectric constants, <math>\epsilon = 78.35</math>) and pentyl ethanoate (<math>\epsilon = 4.73</math>) are the <i>de facto</i> standard solvents in the literature to mimic the polar and nonpolar environments in the human body.<sup>15, 21-23</sup> Thus, these solvents were used to model the physiological environments. The solvent cage effects were included following the corrections proposed by Okuno,<sup>24</sup> adjusted with the free volume theory according to the Benson correction<sup>15, 25-27</sup> to reduce over-penalizing entropy losses in solution. All transition states were characterized by the existence of only one single imaginary frequency. Intrinsic coordinate calculations (IRCs) were performed to ensure that each transition state is connected correctly with the pre-complex and post-complex. The kinetic calculations were performed by the Eyringpy code<sup>28, 29</sup></p> |
|-----------------------------------------------------------------------------------------------------------------------------------------------------------------------------------------------------------------------------------------------------------------------------------------------------------------------------------------------------------------------------------------------------------------------------------------------------------------------------------------------------------------------------------------------------------------------------------------------------------------------------------------------------------------------------------------------------------------------------------------------------------------------------------------------------------------------------------------------------------------------------------------------------------------------------------------------------------------------------------------------------------------------------------------------------------------------------------------------------------------------------------------------------------------------------------------------------------------------------------------------------------------------------------------------------------------------------------------------------------------------------------------------------------------------------------------------------------------------------------------------------------------------------------------------------------------------------------------------------------------------------------------------------------------------------------------------------------------------------------------------------------------------------------------------------------------------------------------------------------------------------------------------------------------------------------------------------------------------------------------------------------------------------------------------------------------------------------------------------------------------------------------------------------------------------------------------------------------------------------------------------------------------------------------------------------------------------------------------------------------------------------------------------------------------------------------------------------------------------------------------------------------------------------------------------------------------------------------------------------------------------------------------------------------------------------------------------------------------------------------------------------------------------------------------------------------------------------------------------------------------------------------------------------------------------------------------------------------------------------------------------------------------------------------------------------------------------------------------------------------------------------------------------------------------------------------------------------------------------------------------------------------------------------------------------------------------------------------------------------------------------------------------------------------------------------------------------------------------------------------------------------------------------------------------------------------------------------------------|

**Table S2.** The cartesian coordinates and energies of transition states in the studied media

| Name                  | H3W-site 1-TS-P  |             |             |                                                           |
|-----------------------|------------------|-------------|-------------|-----------------------------------------------------------|
| Cartesian Coordinates | Energy (Hartree) |             |             |                                                           |
| O                     | -2.00888000      | -0.67005700 | -0.74427000 | Zero-point correction= 0.429915 (Hartree/Particle)        |
| O                     | -3.01851800      | -3.48720100 | 1.31247100  | Thermal correction to Energy= 0.461660                    |
| O                     | -5.50640300      | -2.41293000 | 0.50409800  | Thermal correction to Enthalpy= 0.462604                  |
| O                     | -5.43783100      | 0.38007300  | -0.06691100 | Thermal correction to Gibbs Free Energy= 0.366263         |
| O                     | -3.08772400      | 1.24597000  | -1.36893800 | Sum of electronic and zero-point Energies= -1790.323638   |
| O                     | 0.49787700       | -1.82319300 | 0.07437200  | Sum of electronic and thermal Energies= -1790.291894      |
| O                     | 1.68618700       | -3.49627400 | -0.82368400 | Sum of electronic and thermal Enthalpies= -1790.290949    |
| O                     | 6.38061800       | -1.60345700 | -0.89441800 | Sum of electronic and thermal Free Energies= -1790.387290 |
| O                     | 3.84531100       | 1.58803700  | 1.48103500  |                                                           |
| O                     | 6.19722400       | 0.76587800  | 0.43320700  |                                                           |
| C                     | -3.15636800      | -2.52448100 | 0.28887500  |                                                           |
| C                     | -4.34113700      | -1.61288900 | 0.56198400  |                                                           |
| C                     | -1.86871900      | -1.69724300 | 0.23081000  |                                                           |
| C                     | -4.37879400      | -0.47616600 | -0.44116200 |                                                           |
| C                     | -3.03452900      | 0.24147600  | -0.41130300 |                                                           |
| C                     | -0.70138900      | -2.56704600 | -0.16276200 |                                                           |
| C                     | 1.63662800       | -2.40820500 | -0.30559000 |                                                           |
| C                     | 2.82530500       | -1.55245500 | -0.03636500 |                                                           |
| C                     | 2.71325600       | -0.37008400 | 0.67346700  |                                                           |
| C                     | 4.06093600       | -1.97337300 | -0.55352300 |                                                           |
| C                     | 5.19521300       | -1.19624400 | -0.38271500 |                                                           |
| C                     | 3.85729600       | 0.43763600  | 0.84358500  |                                                           |
| C                     | 5.09368100       | 0.01432600  | 0.29977900  |                                                           |
| H                     | -3.30696300      | -3.01338700 | -0.68427400 |                                                           |
| H                     | -4.22736900      | -1.18591000 | 1.56914200  |                                                           |
| H                     | -1.68012200      | -1.25410700 | 1.21925100  |                                                           |
| H                     | -4.53100400      | -0.87527600 | -1.45187800 |                                                           |
| H                     | -2.85340000      | 0.65337900  | 0.59381100  |                                                           |
| H                     | -0.76728600      | -2.83385100 | -1.22012300 |                                                           |
| H                     | -0.69244500      | -3.47717700 | 0.43938800  |                                                           |
| H                     | -3.87565100      | -3.91529800 | 1.42321300  |                                                           |
| H                     | -6.26624300      | -1.84744200 | 0.68340700  |                                                           |
| H                     | -5.54134500      | 1.04605100  | -0.75562500 |                                                           |
| H                     | 1.77161700       | -0.03084600 | 1.08886600  |                                                           |
| H                     | 4.13131600       | -2.90672800 | -1.09938400 |                                                           |
| H                     | 7.05746600       | -0.94224400 | -0.70034800 |                                                           |
| H                     | 3.23518900       | 2.33385900  | 0.86929700  |                                                           |
| H                     | 5.96032500       | 1.56930800  | 0.92341500  |                                                           |
| C                     | -2.15890400      | 2.32911000  | -1.27293400 |                                                           |
| C                     | -2.33071400      | 3.10445800  | 0.01322600  |                                                           |

|                       |             |             |             |                                                           |
|-----------------------|-------------|-------------|-------------|-----------------------------------------------------------|
| C                     | -0.70675700 | 1.95559500  | -1.49364200 |                                                           |
| C                     | -1.40639800 | 2.98801300  | 0.97122900  |                                                           |
| H                     | -0.17415500 | 2.84718600  | -1.83651300 |                                                           |
| C                     | -0.28325400 | 2.03645500  | 0.88137100  |                                                           |
| H                     | -1.48817700 | 3.50758400  | 1.91886900  |                                                           |
| O                     | -0.03288000 | 1.46506600  | -0.32032600 |                                                           |
| O                     | 0.37886100  | 1.70365700  | 1.82923300  |                                                           |
| H                     | -0.61828600 | 1.16363600  | -2.23526400 |                                                           |
| H                     | -2.43911200 | 2.97438600  | -2.10899900 |                                                           |
| C                     | -3.56971200 | 3.92449000  | 0.15472700  |                                                           |
| H                     | -3.60412100 | 4.43533700  | 1.11668100  |                                                           |
| H                     | -3.62903700 | 4.66393500  | -0.64926400 |                                                           |
| H                     | -4.45084200 | 3.28099700  | 0.06727700  |                                                           |
| O                     | 2.61354600  | 1.96697400  | -1.03113100 |                                                           |
| H                     | 1.77374700  | 1.50210300  | -0.83562900 |                                                           |
| O                     | 2.68537100  | 2.92549300  | -0.07094400 |                                                           |
| <b>Name</b>           |             |             |             | <b>H3W- site 2-TS-P</b>                                   |
| Cartesian Coordinates |             |             |             | Energy (Hartree)                                          |
| O                     | 2.24877900  | -0.56186400 | 0.77348300  | Zero-point correction= 0.430680 (Hartree/Particle)        |
| O                     | 3.39520900  | -3.44536600 | -1.11563200 | Thermal correction to Energy= 0.462046                    |
| O                     | 5.81738600  | -2.09667500 | -0.57387000 | Thermal correction to Enthalpy= 0.462990                  |
| O                     | 5.53822200  | 0.71081400  | -0.17657000 | Thermal correction to Gibbs Free Energy= 0.367269         |
| O                     | 3.22504800  | 1.43886400  | 1.27240600  | Sum of electronic and zero-point Energies= -1790.328303   |
| O                     | -0.16717800 | -1.92218500 | 0.15721800  | Sum of electronic and thermal Energies= -1790.296937      |
| O                     | -1.30533200 | -3.71159000 | 0.88315000  | Sum of electronic and thermal Enthalpies= -1790.295993    |
| O                     | -6.10888300 | -2.12832800 | 0.17082700  | Sum of electronic and thermal Free Energies= -1790.391714 |
| O                     | -3.40102300 | 1.53188000  | -1.13176600 |                                                           |
| O                     | -5.86888100 | 0.31989300  | -0.86771000 |                                                           |
| C                     | 3.50668200  | -2.39165100 | -0.18310400 |                                                           |
| C                     | 4.58324000  | -1.40708800 | -0.60581600 |                                                           |
| C                     | 2.15966700  | -1.67034100 | -0.11540800 |                                                           |
| C                     | 4.58034200  | -0.20357200 | 0.31557300  |                                                           |
| C                     | 3.18269700  | 0.40691400  | 0.34331000  |                                                           |
| C                     | 1.07488900  | -2.58932700 | 0.39003300  |                                                           |
| C                     | -1.28687600 | -2.59548500 | 0.43046900  |                                                           |
| C                     | -2.50015600 | -1.79000400 | 0.09955900  |                                                           |
| C                     | -2.34835400 | -0.49559800 | -0.39350000 |                                                           |
| C                     | -3.75663100 | -2.36322800 | 0.30537900  |                                                           |
| C                     | -4.87973100 | -1.61812800 | 0.00210800  |                                                           |
| C                     | -3.47045800 | 0.25521800  | -0.69803600 |                                                           |
| C                     | -4.76555600 | -0.29865200 | -0.52271400 |                                                           |
| H                     | 3.75601200  | -2.78053800 | 0.81440400  |                                                           |
| H                     | 4.36575200  | -1.06989200 | -1.62993500 |                                                           |
| H                     | 1.89285600  | -1.32274200 | -1.12376300 |                                                           |
| H                     | 4.82777900  | -0.52153400 | 1.33614000  |                                                           |
| H                     | 2.90321300  | 0.77542500  | -0.65736600 |                                                           |
| H                     | 1.19796700  | -2.78265600 | 1.45874300  |                                                           |
| H                     | 1.09573300  | -3.53383700 | -0.15552600 |                                                           |
| H                     | 4.28013100  | -3.80317500 | -1.25408200 |                                                           |

|                       |             |             |             |                                                           |
|-----------------------|-------------|-------------|-------------|-----------------------------------------------------------|
| H                     | 6.51069700  | -1.48151900 | -0.83912500 |                                                           |
| H                     | 5.67260000  | 1.39229100  | 0.49140100  |                                                           |
| H                     | -1.36348300 | -0.07037600 | -0.51853200 |                                                           |
| H                     | -3.85133400 | -3.36925900 | 0.69363500  |                                                           |
| H                     | -6.75097900 | -1.45637100 | -0.10559200 |                                                           |
| H                     | -2.46169300 | 1.78535500  | -1.28547800 |                                                           |
| H                     | -5.98207600 | 1.32215300  | -0.34643600 |                                                           |
| C                     | 2.23010900  | 2.45903200  | 1.21272300  |                                                           |
| C                     | 2.29746900  | 3.23981100  | -0.07996100 |                                                           |
| C                     | 0.81300900  | 2.01323600  | 1.54006000  |                                                           |
| C                     | 1.24485700  | 3.25494100  | -0.90498000 |                                                           |
| H                     | 0.29821500  | 2.83492500  | 2.04290100  |                                                           |
| C                     | 0.06507200  | 2.40710700  | -0.68998100 |                                                           |
| H                     | 1.23954700  | 3.82912400  | -1.82385900 |                                                           |
| O                     | 0.00957200  | 1.65058500  | 0.40299000  |                                                           |
| O                     | -0.83202400 | 2.32445000  | -1.50992000 |                                                           |
| H                     | 0.82287100  | 1.13773600  | 2.18441800  |                                                           |
| H                     | 2.52635900  | 3.13446500  | 2.01944000  |                                                           |
| C                     | 3.57599600  | 3.95130100  | -0.37460000 |                                                           |
| H                     | 3.49193300  | 4.56530300  | -1.27085700 |                                                           |
| H                     | 3.86999600  | 4.57863300  | 0.47140100  |                                                           |
| H                     | 4.37477700  | 3.21882600  | -0.52922000 |                                                           |
| O                     | -4.84258600 | 2.12962700  | 1.14437100  |                                                           |
| H                     | -4.15246400 | 2.28468600  | 0.46929800  |                                                           |
| O                     | -6.00855900 | 2.25315500  | 0.46243600  |                                                           |
| <b>Name</b>           |             |             |             | <b>H3W- site 3-TS-P</b>                                   |
| Cartesian Coordinates |             |             |             | Energy (Hartree)                                          |
| O                     | 2.21615500  | -0.64140900 | 0.75556000  | Zero-point correction= 0.429928 (Hartree/Particle)        |
| O                     | 3.38993500  | -3.47956400 | -1.18165500 | Thermal correction to Energy= 0.461663                    |
| O                     | 5.81210100  | -2.24484200 | -0.41125400 | Thermal correction to Enthalpy= 0.462607                  |
| O                     | 5.60433200  | 0.54851000  | 0.09198500  | Thermal correction to Gibbs Free Energy= 0.365363         |
| O                     | 3.21723400  | 1.29386600  | 1.42553800  | Sum of electronic and zero-point Energies= -1790.323010   |
| O                     | -0.19440600 | -1.84359000 | -0.09824700 | Sum of electronic and thermal Energies= -1790.291275      |
| O                     | -1.48294700 | -3.46124700 | 0.76728600  | Sum of electronic and thermal Enthalpies= -1790.290331    |
| O                     | -6.10701300 | -1.37791400 | 0.04138200  | Sum of electronic and thermal Free Energies= -1790.387575 |
| O                     | -3.11035600 | 1.78613200  | -1.70994400 |                                                           |
| O                     | -5.59876600 | 1.05413300  | -1.10380400 |                                                           |
| C                     | 3.46987000  | -2.47173800 | -0.19650700 |                                                           |
| C                     | 4.60728100  | -1.50984800 | -0.49639500 |                                                           |
| C                     | 2.14959400  | -1.70079900 | -0.19193700 |                                                           |
| C                     | 4.58236200  | -0.34774000 | 0.47706700  |                                                           |
| C                     | 3.20826900  | 0.31344800  | 0.44101800  |                                                           |
| C                     | 0.99005700  | -2.58715100 | 0.19240200  |                                                           |
| C                     | -1.36842300 | -2.38705000 | 0.23442300  |                                                           |
| C                     | -2.49817000 | -1.48729700 | -0.13573000 |                                                           |
| C                     | -2.22894500 | -0.26888400 | -0.78681500 |                                                           |
| C                     | -3.78785600 | -1.85780700 | 0.17767300  |                                                           |
| C                     | -4.86658300 | -1.01599200 | -0.17481300 |                                                           |
| C                     | -3.26269000 | 0.58485200  | -1.10722300 |                                                           |

|                       |             |             |             |                                                           |
|-----------------------|-------------|-------------|-------------|-----------------------------------------------------------|
| C                     | -4.58204800 | 0.22068800  | -0.81082800 |                                                           |
| H                     | 3.63211200  | -2.91216400 | 0.79747200  |                                                           |
| H                     | 4.47447200  | -1.11941800 | -1.51611300 |                                                           |
| H                     | 1.97328700  | -1.29395000 | -1.19825500 |                                                           |
| H                     | 4.74765000  | -0.71918700 | 1.49616400  |                                                           |
| H                     | 3.01140200  | 0.74331100  | -0.55495700 |                                                           |
| H                     | 1.02694600  | -2.82985800 | 1.25703000  |                                                           |
| H                     | 1.00251000  | -3.50813600 | -0.39300200 |                                                           |
| H                     | 4.26825900  | -3.86838900 | -1.26884100 |                                                           |
| H                     | 6.54276300  | -1.64403000 | -0.59720800 |                                                           |
| H                     | 5.72118700  | 1.19224000  | 0.79934800  |                                                           |
| H                     | -1.21059500 | 0.01204500  | -1.01367300 |                                                           |
| H                     | -3.99949200 | -2.79555400 | 0.67635000  |                                                           |
| H                     | -6.62569100 | -0.64739200 | 0.73318000  |                                                           |
| H                     | -2.16045900 | 2.02105400  | -1.75941300 |                                                           |
| H                     | -5.24192200 | 1.81020600  | -1.59561000 |                                                           |
| C                     | 2.24927200  | 2.33970700  | 1.35689200  |                                                           |
| C                     | 2.47413700  | 3.23399000  | 0.15839100  |                                                           |
| C                     | 0.79720000  | 1.90482900  | 1.47350000  |                                                           |
| C                     | 1.53294400  | 3.32779800  | -0.78730100 |                                                           |
| H                     | 0.23568000  | 2.70590900  | 1.95972500  |                                                           |
| C                     | 0.33635300  | 2.47411700  | -0.79431800 |                                                           |
| H                     | 1.64007600  | 3.97941000  | -1.64642800 |                                                           |
| O                     | 0.14550700  | 1.63366500  | 0.22028400  |                                                           |
| O                     | -0.44763200 | 2.46401200  | -1.72549800 |                                                           |
| H                     | 0.70932500  | 0.99057100  | 2.05481700  |                                                           |
| H                     | 2.46114500  | 2.92803400  | 2.25333700  |                                                           |
| C                     | 3.77390300  | 3.96488800  | 0.09306300  |                                                           |
| H                     | 3.80321900  | 4.64928300  | -0.75440400 |                                                           |
| H                     | 3.94690600  | 4.52220900  | 1.01792900  |                                                           |
| H                     | 4.59353700  | 3.24698000  | -0.01098400 |                                                           |
| O                     | -6.91934500 | 0.16813700  | 1.61690900  |                                                           |
| O                     | -5.79748400 | 0.92726200  | 1.75283100  |                                                           |
| H                     | -5.83000400 | 1.53955300  | 0.99718300  |                                                           |
| <b>Name</b>           |             |             |             | <b>H2W(-)-site 1-TS-W</b>                                 |
| Cartesian Coordinates |             |             |             | Energy (Hartree)                                          |
| O                     | -1.96762800 | -0.70465000 | -0.68498500 | Zero-point correction= 0.416790 (Hartree/Particle)        |
| O                     | -3.40132700 | -3.31087900 | 1.40042700  | Thermal correction to Energy= 0.448808                    |
| O                     | -5.71169100 | -1.97995600 | 0.40701900  | Thermal correction to Enthalpy= 0.449753                  |
| O                     | -5.26221400 | 0.78976200  | -0.19580800 | Thermal correction to Gibbs Free Energy= 0.352519         |
| O                     | -2.77292900 | 1.27167000  | -1.48419900 | Sum of electronic and zero-point Energies= -1789.907968   |
| O                     | 0.33129500  | -2.00738500 | 0.24143400  | Sum of electronic and thermal Energies= -1789.875950      |
| O                     | 1.41858700  | -3.61115200 | -0.88490600 | Sum of electronic and thermal Enthalpies= -1789.875006    |
| O                     | 6.03606300  | -1.43986400 | -1.38711300 | Sum of electronic and thermal Free Energies= -1789.972240 |
| O                     | 3.75536000  | 1.12314300  | 1.93782100  |                                                           |
| O                     | 5.98258300  | 0.60561100  | 0.35356900  |                                                           |
| C                     | -3.37721800 | -2.37342300 | 0.33843500  |                                                           |
| C                     | -4.46027300 | -1.32174900 | 0.52225700  |                                                           |
| C                     | -2.00455000 | -1.70187600 | 0.33303000  |                                                           |

|                       |             |             |             |                                                         |
|-----------------------|-------------|-------------|-------------|---------------------------------------------------------|
| C                     | -4.31309300 | -0.21308700 | -0.50654900 |                                                         |
| C                     | -2.89415000 | 0.34124100  | -0.45220900 |                                                         |
| C                     | -0.90843900 | -2.69105200 | 0.02296900  |                                                         |
| C                     | 1.43918300  | -2.56215700 | -0.26715700 |                                                         |
| C                     | 2.64118000  | -1.75132700 | -0.02331300 |                                                         |
| C                     | 2.62895900  | -0.70759700 | 0.89076200  |                                                         |
| C                     | 3.80210900  | -2.02237600 | -0.78887100 |                                                         |
| C                     | 4.90449200  | -1.22838500 | -0.64647400 |                                                         |
| C                     | 3.75660700  | 0.09697500  | 1.04907800  |                                                         |
| C                     | 4.94537100  | -0.12086400 | 0.27505600  |                                                         |
| H                     | -3.53176300 | -2.87988000 | -0.62337900 |                                                         |
| H                     | -4.35710800 | -0.88717500 | 1.52542300  |                                                         |
| H                     | -1.82422200 | -1.23742300 | 1.31222200  |                                                         |
| H                     | -4.48509700 | -0.61647100 | -1.51169800 |                                                         |
| H                     | -2.69862400 | 0.79505900  | 0.52953400  |                                                         |
| H                     | -0.97770500 | -3.01172200 | -1.01804600 |                                                         |
| H                     | -0.96561300 | -3.55849200 | 0.68145600  |                                                         |
| H                     | -4.28722700 | -3.69229500 | 1.43611100  |                                                         |
| H                     | -6.40520700 | -1.36430900 | 0.67233700  |                                                         |
| H                     | -5.27098900 | 1.43314700  | -0.91527900 |                                                         |
| H                     | 1.74804500  | -0.48557400 | 1.47947800  |                                                         |
| H                     | 3.80819200  | -2.83788700 | -1.50285500 |                                                         |
| H                     | 6.66072500  | -0.74231600 | -1.12781400 |                                                         |
| H                     | 3.63336200  | 1.98564600  | 1.41511200  |                                                         |
| C                     | -1.77540000 | 2.29446300  | -1.37565000 |                                                         |
| C                     | -1.99683500 | 3.16281800  | -0.16015000 |                                                         |
| C                     | -0.33960000 | 1.81890800  | -1.46196600 |                                                         |
| C                     | -1.12515800 | 3.11074400  | 0.85282200  |                                                         |
| H                     | 0.27131700  | 2.64296100  | -1.83653100 |                                                         |
| C                     | -0.02679800 | 2.13680200  | 0.90062600  |                                                         |
| H                     | -1.24231100 | 3.71472100  | 1.74477500  |                                                         |
| O                     | 0.23247600  | 1.40449100  | -0.20058600 |                                                         |
| O                     | 0.62283100  | 1.91829100  | 1.90071100  |                                                         |
| H                     | -0.24471300 | 0.96054600  | -2.12325100 |                                                         |
| H                     | -1.94575900 | 2.90273400  | -2.26665400 |                                                         |
| C                     | -3.21845100 | 4.01681900  | -0.15237600 |                                                         |
| H                     | -3.29782900 | 4.59101300  | 0.76992800  |                                                         |
| H                     | -3.20255800 | 4.69768900  | -1.00821000 |                                                         |
| H                     | -4.10675200 | 3.38617100  | -0.25960400 |                                                         |
| O                     | 3.05935800  | 1.92710200  | -0.72565300 |                                                         |
| H                     | 2.16192600  | 1.56451000  | -0.57142000 |                                                         |
| O                     | 3.23877200  | 2.88007600  | 0.20932400  |                                                         |
| <b>Name</b>           |             |             |             | <b>H2W(-)-site 3-TS-W</b>                               |
| Cartesian Coordinates |             |             |             | Energy (Hartree)                                        |
| O                     | 1.96983000  | -0.72854600 | 0.72529100  | Zero-point correction= 0.417370 (Hartree/Particle)      |
| O                     | 3.26834100  | -3.51876800 | -1.18666200 | Thermal correction to Energy= 0.449845                  |
| O                     | 5.58878800  | -2.50947700 | 0.08160700  | Thermal correction to Enthalpy= 0.450790                |
| O                     | 5.47054800  | 0.28662500  | 0.65770700  | Thermal correction to Gibbs Free Energy= 0.350642       |
| O                     | 2.89677800  | 1.16798800  | 1.55679200  | Sum of electronic and zero-point Energies= -1789.871796 |



|   |             |             |             |                                              |              |
|---|-------------|-------------|-------------|----------------------------------------------|--------------|
| O | -0.38708400 | -1.71029100 | -0.32279300 | Sum of electronic and thermal Energies=      | -1789.839320 |
| O | -1.74810800 | -3.40801500 | 0.20299900  | Sum of electronic and thermal Enthalpies=    | -1789.838376 |
| O | -3.24941700 | 2.24894900  | -1.15876700 | Sum of electronic and thermal Free Energies= | -1789.938523 |
| O | -5.75635600 | 1.38962100  | -0.84265400 |                                              |              |
| C | 3.23869800  | -2.57880200 | -0.13271100 |                                              |              |
| C | 4.46834700  | -1.68361300 | -0.16916100 |                                              |              |
| C | 1.97446000  | -1.73059500 | -0.27870200 |                                              |              |
| C | 4.35326100  | -0.55603700 | 0.84436800  |                                              |              |
| C | 3.04346000  | 0.17884400  | 0.59341100  |                                              |              |
| C | 0.73103500  | -2.56529700 | -0.08995600 |                                              |              |
| C | -1.60240400 | -2.24618200 | -0.11507500 |                                              |              |
| C | -2.69080900 | -1.27142100 | -0.30480700 |                                              |              |
| C | -2.41446700 | 0.07134900  | -0.66206100 |                                              |              |
| C | -3.99897700 | -1.69571200 | -0.09020900 |                                              |              |
| C | -5.05680400 | -0.80775000 | -0.25286000 |                                              |              |
| C | -3.45202900 | 0.95039800  | -0.81317100 |                                              |              |
| C | -4.83128400 | 0.55603000  | -0.65334200 |                                              |              |
| H | 3.21048400  | -3.09021900 | 0.83967400  |                                              |              |
| H | 4.54651800  | -1.24041000 | -1.17245700 |                                              |              |
| H | 1.95862900  | -1.26310100 | -1.27389900 |                                              |              |
| H | 4.33172500  | -0.96808500 | 1.86066300  |                                              |              |
| H | 3.05126400  | 0.60520700  | -0.42115400 |                                              |              |
| H | 0.69007400  | -2.95533000 | 0.93020500  |                                              |              |
| H | 0.72345500  | -3.39898700 | -0.79371500 |                                              |              |
| H | 4.11909600  | -3.97105300 | -1.14883200 |                                              |              |
| H | 6.38333500  | -1.96859800 | 0.01400300  |                                              |              |
| H | 5.50275500  | 0.91672700  | 1.38492700  |                                              |              |
| H | -1.39489800 | 0.40130300  | -0.81725800 |                                              |              |
| H | -4.20095900 | -2.71705600 | 0.20970300  |                                              |              |
| H | -4.13785200 | 2.64008900  | -1.20737200 |                                              |              |
| C | 2.01416900  | 2.25203100  | 1.24011000  |                                              |              |
| C | 2.69498300  | 3.22147300  | 0.29892100  |                                              |              |
| C | 0.65028300  | 1.85586100  | 0.70233200  |                                              |              |
| C | 2.31526900  | 3.26327200  | -0.98229600 |                                              |              |
| H | -0.03078600 | 2.69813100  | 0.84506500  |                                              |              |
| C | 1.32010400  | 2.33072700  | -1.54648400 |                                              |              |
| H | 2.77952000  | 3.92906600  | -1.69995600 |                                              |              |
| O | 0.66245400  | 1.52405700  | -0.69562400 |                                              |              |
| O | 1.12426000  | 2.21528300  | -2.73287800 |                                              |              |
| H | 0.26098100  | 0.97446100  | 1.20545500  |                                              |              |
| H | 1.85040600  | 2.74463200  | 2.20070100  |                                              |              |
| C | 3.78691100  | 4.06524700  | 0.86950900  |                                              |              |
| H | 4.28849900  | 4.65046600  | 0.10025400  |                                              |              |
| H | 3.37481200  | 4.74175200  | 1.62384900  |                                              |              |
| H | 4.51991000  | 3.43191400  | 1.37583000  |                                              |              |
| O | -6.32955500 | -1.19783800 | -0.04550500 |                                              |              |
| H | -6.76410600 | -0.49679600 | 0.52052800  |                                              |              |
| O | -6.74914000 | 0.40718800  | 1.92009200  |                                              |              |
| O | -5.40892100 | 0.46902100  | 2.11989300  |                                              |              |
| H | -5.14745200 | -0.40944300 | 2.44090900  |                                              |              |

| Name                  |             |             |             | H3W- site 1-TS-W                             |                             |
|-----------------------|-------------|-------------|-------------|----------------------------------------------|-----------------------------|
| Cartesian Coordinates |             |             |             | Energy (Hartree)                             |                             |
| O                     | -2.00068900 | -0.69722500 | -0.73492400 | Zero-point correction=                       | 0.429281 (Hartree/Particle) |
| O                     | -3.12339100 | -3.49326500 | 1.29364500  | Thermal correction to Energy=                | 0.461127                    |
| O                     | -5.57702600 | -2.32910100 | 0.44267500  | Thermal correction to Enthalpy=              | 0.462071                    |
| O                     | -5.38131800 | 0.49828900  | -0.04552300 | Thermal correction to Gibbs Free Energy=     | 0.365857                    |
| O                     | -3.00433200 | 1.24211900  | -1.39945400 | Sum of electronic and zero-point Energies=   | -1790.345686                |
| O                     | 0.44487600  | -1.86313500 | 0.05991400  | Sum of electronic and thermal Energies=      | -1790.313839                |
| O                     | 1.63951300  | -3.58804000 | -0.72005500 | Sum of electronic and thermal Enthalpies=    | -1790.312895                |
| O                     | 6.31657200  | -1.63858300 | -0.93985400 | Sum of electronic and thermal Free Energies= | -1790.409109                |
| O                     | 3.78090000  | 1.51846400  | 1.53591300  |                                              |                             |
| O                     | 6.13947300  | 0.73738400  | 0.40755200  |                                              |                             |
| C                     | -3.22330600 | -2.51644300 | 0.27265400  |                                              |                             |
| C                     | -4.38293000 | -1.56998600 | 0.54357100  |                                              |                             |
| C                     | -1.91154900 | -1.73086100 | 0.24179900  |                                              |                             |
| C                     | -4.37007200 | -0.41054100 | -0.43802200 |                                              |                             |
| C                     | -2.99973900 | 0.25582600  | -0.41349700 |                                              |                             |
| C                     | -0.75766400 | -2.62237000 | -0.13968500 |                                              |                             |
| C                     | 1.58774000  | -2.46725200 | -0.26098100 |                                              |                             |
| C                     | 2.77463100  | -1.61086500 | -0.01248800 |                                              |                             |
| C                     | 2.66874900  | -0.43638400 | 0.70728600  |                                              |                             |
| C                     | 4.00665400  | -2.01834100 | -0.55185400 |                                              |                             |
| C                     | 5.13433900  | -1.23350600 | -0.39607300 |                                              |                             |
| C                     | 3.80881800  | 0.37570700  | 0.87096200  |                                              |                             |
| C                     | 5.04147600  | -0.02483900 | 0.29830500  |                                              |                             |
| H                     | -3.37522900 | -2.99571000 | -0.70341600 |                                              |                             |
| H                     | -4.27686600 | -1.17144200 | 1.56113400  |                                              |                             |
| H                     | -1.72953300 | -1.28990800 | 1.23168200  |                                              |                             |
| H                     | -4.55145000 | -0.78366400 | -1.45321800 |                                              |                             |
| H                     | -2.79867200 | 0.67715400  | 0.58139600  |                                              |                             |
| H                     | -0.83242900 | -2.91669300 | -1.18866700 |                                              |                             |
| H                     | -0.73207400 | -3.50992900 | 0.49271600  |                                              |                             |
| H                     | -3.97146700 | -3.95087300 | 1.34812200  |                                              |                             |
| H                     | -6.30724300 | -1.79881000 | 0.78264000  |                                              |                             |
| H                     | -5.45313300 | 1.18253200  | -0.72265800 |                                              |                             |
| H                     | 1.73309800  | -0.10336900 | 1.13791000  |                                              |                             |
| H                     | 4.08160300  | -2.94487900 | -1.10863500 |                                              |                             |
| H                     | 7.00997300  | -0.99430900 | -0.73998800 |                                              |                             |
| H                     | 3.31165900  | 2.30128700  | 0.86957100  |                                              |                             |
| H                     | 5.92041800  | 1.54132300  | 0.90669600  |                                              |                             |
| C                     | -2.08813500 | 2.33704500  | -1.28272800 |                                              |                             |
| C                     | -2.29566100 | 3.11162500  | -0.00262500 |                                              |                             |
| C                     | -0.62947000 | 1.98477500  | -1.47816700 |                                              |                             |
| C                     | -1.36137900 | 3.06255900  | 0.95360400  |                                              |                             |
| H                     | -0.10040600 | 2.88066700  | -1.81024000 |                                              |                             |
| C                     | -0.20118900 | 2.16454300  | 0.87818200  |                                              |                             |
| H                     | -1.46492500 | 3.60202500  | 1.88758400  |                                              |                             |
| O                     | 0.03143300  | 1.51656200  | -0.28111300 |                                              |                             |
| O                     | 0.51786900  | 1.92708400  | 1.82472300  |                                              |                             |

|                       |             |             |             |                                                           |
|-----------------------|-------------|-------------|-------------|-----------------------------------------------------------|
| H                     | -0.50613900 | 1.19037900  | -2.21100000 |                                                           |
| H                     | -2.36028100 | 2.98194900  | -2.12112600 |                                                           |
| C                     | -3.57165500 | 3.87047200  | 0.12759100  |                                                           |
| H                     | -3.64150800 | 4.37342900  | 1.09133100  |                                                           |
| H                     | -3.64987000 | 4.60683600  | -0.67743700 |                                                           |
| H                     | -4.41710500 | 3.18362200  | 0.01794100  |                                                           |
| O                     | 2.72633100  | 1.91851700  | -1.04297400 |                                                           |
| H                     | 1.84341700  | 1.52819900  | -0.86837300 |                                                           |
| O                     | 2.85106800  | 2.91133000  | -0.12689600 |                                                           |
| <b>Name</b>           |             |             |             | <b>H3W- site 2-TS-W</b>                                   |
| Cartesian Coordinates |             |             |             | Energy (Hartree)                                          |
| O                     | 2.00344900  | -0.65509000 | 0.69047300  | Zero-point correction= 0.429627 (Hartree/Particle)        |
| O                     | 3.85138200  | -3.16246700 | -1.17763600 | Thermal correction to Energy= 0.461336                    |
| O                     | 5.92411400  | -1.48333800 | -0.19046600 | Thermal correction to Enthalpy= 0.462280                  |
| O                     | 5.09808600  | 1.22953300  | 0.24091800  | Thermal correction to Gibbs Free Energy= 0.366573         |
| O                     | 2.52253200  | 1.42859300  | 1.44896500  | Sum of electronic and zero-point Energies= -1790.347737   |
| O                     | -0.05947400 | -2.19844800 | -0.26227100 | Sum of electronic and thermal Energies= -1790.316027      |
| O                     | -1.14286100 | -3.86639000 | 0.77265000  | Sum of electronic and thermal Enthalpies= -1790.315083    |
| O                     | -5.72459300 | -1.59927300 | 1.26012300  | Sum of electronic and thermal Free Energies= -1790.410790 |
| O                     | -3.35920500 | 1.00870700  | -1.91011000 |                                                           |
| O                     | -5.58257000 | 0.52183300  | -0.43846000 |                                                           |
| C                     | 3.66007300  | -2.17586900 | -0.17924300 |                                                           |
| C                     | 4.60471000  | -1.00247500 | -0.38829000 |                                                           |
| C                     | 2.21943700  | -1.68175600 | -0.27400800 |                                                           |
| C                     | 4.27251900  | 0.12864400  | 0.57102100  |                                                           |
| C                     | 2.79672200  | 0.49472500  | 0.44905700  |                                                           |
| C                     | 1.22189600  | -2.77615300 | 0.01800800  |                                                           |
| C                     | -1.15038200 | -2.80528500 | 0.18955400  |                                                           |
| C                     | -2.36582600 | -1.98209300 | -0.07251200 |                                                           |
| C                     | -2.28855500 | -0.92973400 | -0.97918300 |                                                           |
| C                     | -3.52111600 | -2.24772600 | 0.66965500  |                                                           |
| C                     | -4.60366900 | -1.40160900 | 0.53287600  |                                                           |
| C                     | -3.37244600 | -0.07845000 | -1.11864700 |                                                           |
| C                     | -4.54889400 | -0.29677700 | -0.35683200 |                                                           |
| H                     | 3.83071500  | -2.60063400 | 0.81845300  |                                                           |
| H                     | 4.48804900  | -0.63979200 | -1.41816100 |                                                           |
| H                     | 2.04089800  | -1.28377600 | -1.28247400 |                                                           |
| H                     | 4.45502400  | -0.20072500 | 1.60097800  |                                                           |
| H                     | 2.57663600  | 0.89245700  | -0.55192600 |                                                           |
| H                     | 1.27033800  | -3.07359500 | 1.06736400  |                                                           |
| H                     | 1.38180200  | -3.64168300 | -0.62531300 |                                                           |
| H                     | 4.78025000  | -3.42450500 | -1.15776200 |                                                           |
| H                     | 6.54344900  | -0.79524700 | -0.46077500 |                                                           |
| H                     | 5.02642500  | 1.88376200  | 0.94645500  |                                                           |
| H                     | -1.38678700 | -0.73919400 | -1.54334200 |                                                           |
| H                     | -3.55741100 | -3.07146300 | 1.37134900  |                                                           |
| H                     | -6.35744300 | -0.89343000 | 1.05422200  |                                                           |
| H                     | -2.43179500 | 1.22579600  | -2.14823300 |                                                           |
| H                     | -5.27565900 | 1.49982200  | -0.03912300 |                                                           |

|                       |             |             |             |                                                           |
|-----------------------|-------------|-------------|-------------|-----------------------------------------------------------|
| C                     | 1.42166800  | 2.32819800  | 1.27661000  |                                                           |
| C                     | 1.63622800  | 3.25483700  | 0.10188000  |                                                           |
| C                     | 0.04721500  | 1.69019300  | 1.23270200  |                                                           |
| C                     | 0.84121900  | 3.15786500  | -0.97038800 |                                                           |
| H                     | -0.68120500 | 2.42241400  | 1.58636400  |                                                           |
| C                     | -0.15905800 | 2.09453700  | -1.10927900 |                                                           |
| H                     | 0.94850200  | 3.81014600  | -1.82871800 |                                                           |
| O                     | -0.37432400 | 1.27359300  | -0.08230100 |                                                           |
| O                     | -0.76556900 | 1.89642400  | -2.15174400 |                                                           |
| H                     | 0.00122700  | 0.79797800  | 1.85286900  |                                                           |
| H                     | 1.44824100  | 2.92847000  | 2.18864100  |                                                           |
| C                     | 2.75046100  | 4.23842600  | 0.21203700  |                                                           |
| H                     | 2.84791800  | 4.83446100  | -0.69444600 |                                                           |
| H                     | 2.57515900  | 4.89826500  | 1.06689100  |                                                           |
| H                     | 3.69105700  | 3.71294900  | 0.40104000  |                                                           |
| O                     | -3.51108700 | 1.83384600  | 1.02056800  |                                                           |
| H                     | -2.84327900 | 2.01629400  | 0.33164500  |                                                           |
| O                     | -4.64804400 | 2.44550600  | 0.60852600  |                                                           |
| <b>Name</b>           |             |             |             | <b>H3W- site 3-TS-W</b>                                   |
| Cartesian Coordinates |             |             |             | Energy (Hartree)                                          |
| O                     | 2.15462600  | -0.67130800 | 0.77361600  | Zero-point correction= 0.429329 (Hartree/Particle)        |
| O                     | 3.32971700  | -3.51079100 | -1.16394400 | Thermal correction to Energy= 0.461267                    |
| O                     | 5.76371600  | -2.28777400 | -0.33525800 | Thermal correction to Enthalpy= 0.462211                  |
| O                     | 5.53487100  | 0.53817700  | 0.10186200  | Thermal correction to Gibbs Free Energy= 0.364674         |
| O                     | 3.14644300  | 1.26264300  | 1.46151900  | Sum of electronic and zero-point Energies= -1790.343708   |
| O                     | -0.24773900 | -1.81472200 | -0.07082700 | Sum of electronic and thermal Energies= -1790.311770      |
| O                     | -1.57196100 | -3.50344300 | 0.57054600  | Sum of electronic and thermal Enthalpies= -1790.310826    |
| O                     | -6.15698300 | -1.24626700 | 0.02168700  | Sum of electronic and thermal Free Energies= -1790.408363 |
| O                     | -3.07637800 | 1.86572000  | -1.71616200 |                                                           |
| O                     | -5.61678900 | 1.14153200  | -1.09650300 |                                                           |
| C                     | 3.41026100  | -2.50306900 | -0.17174000 |                                                           |
| C                     | 4.55912100  | -1.54929500 | -0.46032200 |                                                           |
| C                     | 2.09564800  | -1.72542600 | -0.18340700 |                                                           |
| C                     | 4.52515700  | -0.37086500 | 0.49738100  |                                                           |
| C                     | 3.15047500  | 0.28916200  | 0.46205300  |                                                           |
| C                     | 0.92369800  | -2.60179100 | 0.18193300  |                                                           |
| C                     | -1.43380000 | -2.37962400 | 0.13891800  |                                                           |
| C                     | -2.54779300 | -1.46037100 | -0.21192000 |                                                           |
| C                     | -2.26034800 | -0.23368700 | -0.84237800 |                                                           |
| C                     | -3.84241500 | -1.81295200 | 0.10252300  |                                                           |
| C                     | -4.89495800 | -0.93436800 | -0.22161700 |                                                           |
| C                     | -3.27147000 | 0.65320700  | -1.13582600 |                                                           |
| C                     | -4.59978700 | 0.31195700  | -0.83574900 |                                                           |
| H                     | 3.55601400  | -2.95065000 | 0.81998000  |                                                           |
| H                     | 4.45296800  | -1.17602500 | -1.48749800 |                                                           |
| H                     | 1.93679900  | -1.30559000 | -1.18636500 |                                                           |
| H                     | 4.70070600  | -0.72714400 | 1.51962400  |                                                           |
| H                     | 2.94778000  | 0.72297100  | -0.52776200 |                                                           |
| H                     | 0.95915000  | -2.87984100 | 1.23755000  |                                                           |

|   |             |             |             |
|---|-------------|-------------|-------------|
| H | 0.90028000  | -3.49735900 | -0.43925200 |
| H | 4.18463500  | -3.95720200 | -1.20117500 |
| H | 6.48974000  | -1.74754400 | -0.66877100 |
| H | 5.63585300  | 1.19889400  | 0.79798200  |
| H | -1.24258100 | 0.02859600  | -1.09502700 |
| H | -4.07512700 | -2.75164800 | 0.58997100  |
| H | -6.54000900 | -0.58219200 | 0.82471700  |
| H | -2.11550700 | 2.05296800  | -1.77125800 |
| H | -5.27620900 | 1.96360400  | -1.48320800 |
| C | 2.23187300  | 2.35832000  | 1.35435400  |
| C | 2.51276000  | 3.20762600  | 0.13644100  |
| C | 0.76333700  | 1.99561500  | 1.45404800  |
| C | 1.60446400  | 3.27828700  | -0.84368200 |
| H | 0.22429000  | 2.85409400  | 1.85847300  |
| C | 0.39778200  | 2.44577200  | -0.85534400 |
| H | 1.75247800  | 3.89278400  | -1.72357900 |
| O | 0.14380700  | 1.66365500  | 0.19447000  |
| O | -0.35397400 | 2.39774000  | -1.81708000 |
| H | 0.61090100  | 1.13142300  | 2.09563400  |
| H | 2.45754900  | 2.95634700  | 2.24012100  |
| C | 3.81879900  | 3.92439700  | 0.09586200  |
| H | 3.91920600  | 4.51663800  | -0.81292100 |
| H | 3.91444000  | 4.57438500  | 0.97022900  |
| H | 4.63742100  | 3.19978300  | 0.14229400  |
| O | -6.63662000 | 0.21548200  | 1.82253100  |
| O | -5.35959300 | 0.65270300  | 1.98220900  |
| H | -5.31274000 | 1.49853600  | 1.50175600  |

**Table S3.** Molecular docking parameters for each protein target

| Protein/PDB ID        | Ligand                   | Coordinates of the Grid Box Center                           | Grid Box Size                             |
|-----------------------|--------------------------|--------------------------------------------------------------|-------------------------------------------|
| Cytochrome P450/ 1OG5 | S-Warfarin               | center_x = -20.257<br>center_y = 86.991<br>center_z = 38.581 | size_x = 20<br>size_y = 18<br>size_z = 22 |
| Lipoxygenase/ 1N8Q    | Protocatecuic acid       | center_x = 21.864<br>center_y = 2.184<br>center_z = 18.909   | size_x = 22<br>size_y = 16<br>size_z = 10 |
| Myeloperoxidase/ 1DNU | N-Acetyl-D-glucosamine   | center_x = 39.817<br>center_y = -38.635<br>center_z = -5.308 | size_x = 9<br>size_y = 12<br>size_z = 7   |
| NADPH oxidase/ 2CDU   | Adenosine-5'-diphosphate | center_x = 1.687<br>center_y = 9.885<br>center_z = 54.962    | size_x = 15<br>size_y = 7<br>size_z = 16  |

|                        |              |                                                             |                                         |
|------------------------|--------------|-------------------------------------------------------------|-----------------------------------------|
| Xanthine oxidase/ 3NRZ | Hypoxanthine | center_x = 89.018<br>center_y = 9.4501<br>center_z = 18.290 | size_x = 7<br>size_y = 10<br>size_z = 9 |
|------------------------|--------------|-------------------------------------------------------------|-----------------------------------------|

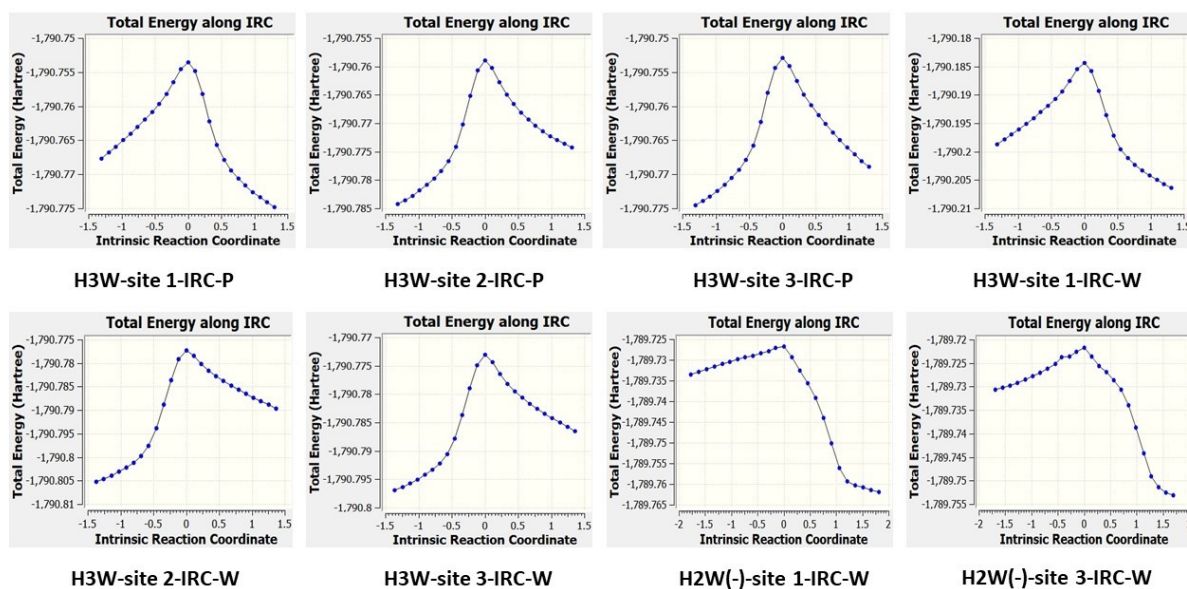

**Figure S1.** IRC plots for all transition states related to reaction of HOO<sup>•</sup> radical with the studied species. (W: water, P: pentylethanoate)

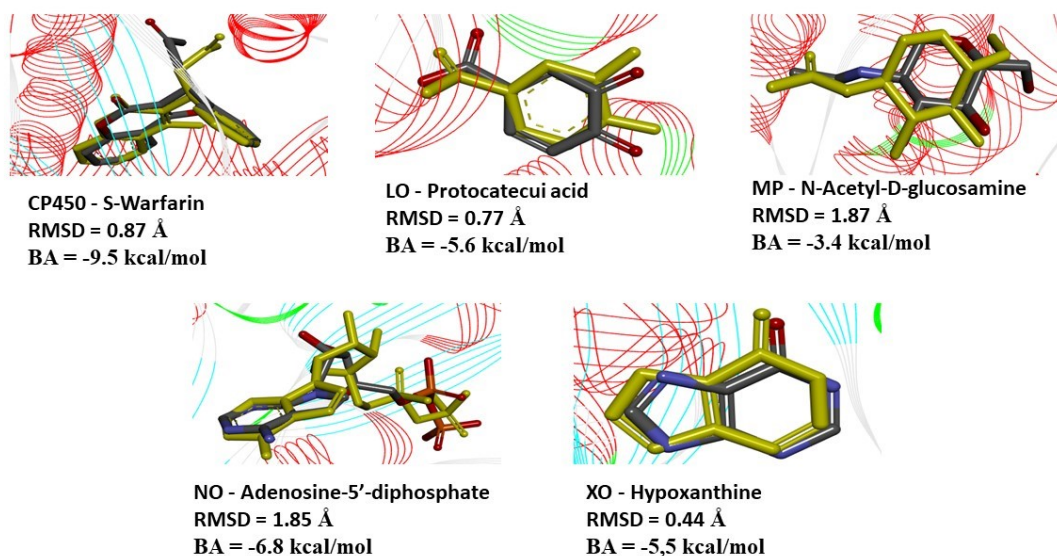

**Figure S2.** Parameters obtained in the validation of docking protocols for CP450, LO, MP, NO and XO receptors. The experimental structures (shown in gray) and the docked structures (shown in yellow).

## References

1. M. G. Evans and M. Polanyi, *Trans. Faraday Soc.*, 1935, **31**, 875-894.
2. H. Eyring, *J. Chem. Phys.*, 1935, **3**, 107-115.
3. D. G. Truhlar, W. L. Hase and J. T. Hynes, *J. Phys. Chem.*, 1983, **87**, 2664-2682.
4. T. Furuncuoglu, I. Ugur, I. Degirmenci and V. Aviyente, *Macromolecules*, 2010, **43**, 1823-1835.
5. E. Vélez, J. Quijano, R. Notario, E. Pabón, J. Murillo, J. Leal, E. Zapata and G. Alarcón, *J. Phys. Org. Chem.*, 2009, **22**, 971-977.
6. E. Pollak and P. Pechukas, *J. Am. Chem. Soc.*, 1978, **100**, 2984-2991.
7. A. Fernández-Ramos, B. A. Ellingson, R. Meana-Pañeda, J. M. Marques and D. G. Truhlar, *Theor. Chem. Acc.*, 2007, **118**, 813-826.
8. C. Eckart, *Phy. Rev.*, 1930, **35**, 1303.
9. R. A. Marcus, *Annu. Rev. Phys. Chem.*, 1964, **15**, 155-196.
10. R. A. Marcus, *Rev. Mod. Phys.*, 1993, **65**, 599.
11. Y. Lu, A. Wang, P. Shi and H. Zhang, *PloS one*, 2017, **12**, e0169773.
12. Y. Lu, A. Wang, P. Shi, H. Zhang and Z. Li, *PloS one*, 2015, **10**, e0133259.
13. S. F. Nelsen, S. C. Blackstock and Y. Kim, *J. Am. Chem. Soc.*, 1987, **109**, 677-682.
14. S. F. Nelsen, M. N. Weaver, Y. Luo, J. R. Pladziewicz, L. K. Ausman, T. L. Jentsch and J. J. O'Konek, *J. Phys. Chem. A*, 2006, **110**, 11665-11676.
15. A. Galano and J. R. Alvarez-Idaboy, *J. Comput. Chem.*, 2013, **34**, 2430-2445.
16. F. C. Collins and G. E. Kimball, *J. Colloid Sci.*, 1949, **4**, 425-437.
17. M. Von Smoluchowski, *Z. Phys. Chem*, 1917, **92**, 129-168.
18. D. G. Truhlar, *J. Chem. Educ.*, 1985, **62**, 104.
19. A. Einstein, *Ann. Phys.*, 1905, **17**, 549-560.
20. G. G. Stokes, *Mathematical and Physical Papers*, University Press, Cambridge, 1905.
21. A. Galano and J. Raúl Alvarez-Idaboy, *Int. J. Quantum Chem.*, 2019, **119**, e25665.
22. Q. V. Vo, T. V. Gon, M. V. Bay and A. Mechler, *J. Phys. Chem. B*, 2019, **123**, 10672-10679.
23. Q. V. Vo and A. Mechler, *J. Chem. Inf. Model.*, 2020, **60**, 316-321.
24. Y. Okuno, *Chem.: Eur. J.*, 1997, **3**, 212-218.
25. S. Benson, *The foundations of chemical kinetics:*, Malabar, Florida, 1982.
26. C. Iuga, J. R. Alvarez-Idaboy and A. Vivier-Bunge, *J. Phys. Chem. B*, 2011, **115**, 12234-12246.
27. J. R. Alvarez-Idaboy, L. Reyes and N. Mora-Diez, *Org. Biomol. Chem.*, 2007, **5**, 3682-3689.
28. E. Dzib, J. L. Cabellos, F. Ortíz-Chi, S. Pan, A. Galano and G. Merino, *Int. J. Quantum Chem.*, 2019, **119**, e25686.
29. E. Dzib, J. L. Cabellos, F. Ortiz-Chi, S. Pan, A. Galano and G. Merino, *Eyringpy 1.0.2*, 2018, Cinvestav, Mérida, Yucatán.
